# Supplementary material
Source: PubMed Central journal article supplement (PMC5040671)
Supplement: ajtr0008-3710-f7.pdf [file ajtr0008-3710-f7.pdf]

## BMP9-mediated bone formation in adipose stem cells

**Supplemental Table 1.** Primers used for qPCR analysis

| Name                  | Oligo Sequence                               |
|-----------------------|----------------------------------------------|
| mouse Gapdh           | ACCCAGAAGACTGTGGATGG<br>CACATTGGGGGTAGGAACAC |
| mouse Runx2           | CCGGTCTCCTTCCAGGAT<br>GGGAAGTCTGTGGCTTC      |
| mouse Osx             | GGGAGCAGAGTGCCAAGA<br>TACTCCTGGCGCATAGGG     |
| mouse Ocn             | CCAAGCAGGAGGGCAATA<br>TCGTACAAGCAGGGTCA      |
| Mouse Sox9            | GGCAAGCAAAGGAGACCA<br>GCAGGCAGACTCCAGCAT     |
| Mouse Ppar $\gamma$ 2 | ACTGCCGGATCCACAAA<br>TCTCCTTCTCGGCCTGTG      |
| SV40 T antigen        | TCAGGCCCTCAGTCCTC<br>TTCAGGGGGAGGTGTGGG      |
